# Supplementary material for: Prevalence of K13-propeller gene polymorphisms among Plasmodium falciparum parasites isolated from adult symptomatic patients in northern Uganda
Source: PubMed Central journal article supplement (PMC4992308; doi:10.1186/s12879-016-1777-7), 2016-08-19
Supplement: 12879_2016_1777_MOESM1_ESM.pdf [file 12879_2016_1777_MOESM1_ESM.pdf]

## NUCLEOTIDE SEQUENCES OF THE FOUR SAMPLES WITH POLYMORPHISMS

>K13D7K13\_WILD TYPE

|     |                                                             |     |
|-----|-------------------------------------------------------------|-----|
| 1   | ATG GAA GGA GAA AAA GTA AAA ACA AAA GCA AAT AGT ATC TCG AAT | 45  |
| 1   | Met Glu Gly Glu Lys Val Lys Thr Lys Ala Asn Ser Ile Ser Asn | 15  |
| 46  | TTT TCT ATG ACG TAT GAT AGG GAA TCT GGT GGT AAC AGC AAT AGT | 90  |
| 16  | Phe Ser Met Thr Tyr Asp Arg Glu Ser Gly Gly Asn Ser Asn Ser | 30  |
| 91  | GAT GAT AAA AGC GGA AGT AGT AGC GAG AAT GAT TCT AAT TCA TTT | 135 |
| 31  | Asp Asp Lys Ser Gly Ser Ser Ser Glu Asn Asp Ser Asn Ser Phe | 45  |
| 136 | ATG AAT CTA ACT AGT GAT AAA AAT GAG AAA ACG GAA AAT AAT AGT | 180 |
| 46  | Met Asn Leu Thr Ser Asp Lys Asn Glu Lys Thr Glu Asn Asn Ser | 60  |
| 181 | TTC CTT TTA AAT AAT AGT AGT TAT GGA AAT GTT AAA GAT AGC CTA | 225 |
| 61  | Phe Leu Leu Asn Asn Ser Ser Tyr Gly Asn Val Lys Asp Ser Leu | 75  |
| 226 | TTA GAA TCC ATT GAT ATG AGT GTA TTA GAT TCG AAC TTT GAT AGT | 270 |
| 76  | Leu Glu Ser Ile Asp Met Ser Val Leu Asp Ser Asn Phe Asp Ser | 90  |
| 271 | AAA AAA GAT TTT TTA CCA AGT AAT TTA TCA AGA ACA TTT AAT AAT | 315 |
| 91  | Lys Lys Asp Phe Leu Pro Ser Asn Leu Ser Arg Thr Phe Asn Asn | 105 |
| 316 | ATG TCT AAA GAT AAT ATA GGA AAT AAA TAT TTA AAT AAA TTG TTA | 360 |
| 106 | Met Ser Lys Asp Asn Ile Gly Asn Lys Tyr Leu Asn Lys Leu Leu | 120 |
| 361 | AAT AAA AAA AAA GAT ACT ATT ACA AAT GAA AAT AAT AAT ATT AAT | 405 |
| 121 | Asn Lys Lys Lys Asp Thr Ile Thr Asn Glu Asn Asn Asn Ile Asn | 135 |
| 406 | CAT AAT AAT AAT AAT AAT AAT CTG ACA GCA AAT AAT ATA ACT AAT | 450 |
| 136 | His Asn Asn Asn Asn Asn Asn Leu Thr Ala Asn Asn Ile Thr Asn | 150 |
| 451 | AAT CTT ATT AAT AAT AAT ATG AAT TCT CCA TCA ATT ATG AAT ACC | 495 |
| 151 | Asn Leu Ile Asn Asn Asn Met Asn Ser Pro Ser Ile Met Asn Thr | 165 |
| 496 | AAC AAA AAA GAG AAT TTT TTA GAT GCA GCA AAT CTT ATA AAT GAT | 540 |
| 166 | Asn Lys Lys Glu Asn Phe Leu Asp Ala Ala Asn Leu Ile Asn Asp | 180 |
| 541 | GAT TCT GGA TTA AAC AAT TTA AAA AAA TTT TCA ACT GTA AAT AAT | 585 |
| 181 | Asp Ser Gly Leu Asn Asn Leu Lys Lys Phe Ser Thr Val Asn Asn | 195 |
| 586 | GTA AAT GAT ACT TAT GAA AAG AAA ATT ATT GAA ACG GAA TTA AGT | 630 |
| 196 | Val Asn Asp Thr Tyr Glu Lys Lys Ile Ile Glu Thr Glu Leu Ser | 210 |
| 631 | GAT GCT AGT GAT TTT GAA AAT ATG GTA GGT GAT TTA AGA ATT ACA | 675 |
| 211 | Asp Ala Ser Asp Phe Glu Asn Met Val Gly Asp Leu Arg Ile Thr | 225 |
| 676 | TTT ATT AAT TGG TTA AAA AAG ACA CAA ATG AAT TTT ATT CGA GAA | 720 |

|      |     |     |     |     |     |     |     |     |     |     |     |     |     |     |     |      |
|------|-----|-----|-----|-----|-----|-----|-----|-----|-----|-----|-----|-----|-----|-----|-----|------|
| 226  | Phe | Ile | Asn | Trp | Leu | Lys | Lys | Thr | Gln | Met | Asn | Phe | Ile | Arg | Glu | 240  |
| 721  | AAA | GAT | AAA | TTA | TTT | AAA | GAT | AAG | AAA | GAA | CTA | GAA | ATG | GAA | AGA | 765  |
| 241  | Lys | Asp | Lys | Leu | Phe | Lys | Asp | Lys | Lys | Glu | Leu | Glu | Met | Glu | Arg | 255  |
| 766  | GTA | CGA | TTG | TAC | AAA | GAA | TTA | GAA | AAC | CGT | AAA | AAT | ATT | GAA | GAA | 810  |
| 256  | Val | Arg | Leu | Tyr | Lys | Glu | Leu | Glu | Asn | Arg | Lys | Asn | Ile | Glu | Glu | 270  |
| 811  | CAG | AAA | TTA | CAT | GAT | GAA | AGA | AAG | AAA | TTA | GAT | ATT | GAT | ATA | TCT | 855  |
| 271  | Gln | Lys | Leu | His | Asp | Glu | Arg | Lys | Lys | Leu | Asp | Ile | Asp | Ile | Ser | 285  |
| 856  | AAT | GGT | TAT | AAA | CAA | ATA | AAA | AAA | GAA | AAA | GAA | GAA | CAT | AGG | AAA | 900  |
| 286  | Asn | Gly | Tyr | Lys | Gln | Ile | Lys | Lys | Glu | Lys | Glu | Glu | His | Arg | Lys | 300  |
| 901  | CGA | TTT | GAT | GAA | GAA | AGA | TTA | AGA | TTT | TTA | CAA | GAA | ATC | GAT | AAA | 945  |
| 301  | Arg | Phe | Asp | Glu | Glu | Arg | Leu | Arg | Phe | Leu | Gln | Glu | Ile | Asp | Lys | 315  |
| 946  | ATT | AAA | TTA | GTA | TTA | TAT | TTA | GAA | AAA | GAA | AAA | TAT | TAT | CAA | GAA | 990  |
| 316  | Ile | Lys | Leu | Val | Leu | Tyr | Leu | Glu | Lys | Glu | Lys | Tyr | Tyr | Gln | Glu | 330  |
| 991  | TAT | AAA | AAT | TTT | GAG | AAT | GAT | AAA | AAA | AAA | ATT | GTT | GAT | GCA | AAT | 1035 |
| 331  | Tyr | Lys | Asn | Phe | Glu | Asn | Asp | Lys | Lys | Lys | Ile | Val | Asp | Ala | Asn | 345  |
| 1036 | ATT | GCT | ACT | GAA | ACT | ATG | ATT | GAT | ATT | AAT | GTT | GGT | GGA | GCT | ATT | 1080 |
| 346  | Ile | Ala | Thr | Glu | Thr | Met | Ile | Asp | Ile | Asn | Val | Gly | Gly | Ala | Ile | 360  |
| 1081 | TTT | GAA | ACA | TCT | AGA | CAT | ACC | TTA | ACA | CAA | CAA | AAA | GAT | TCA | TTT | 1125 |
| 361  | Phe | Glu | Thr | Ser | Arg | His | Thr | Leu | Thr | Gln | Gln | Lys | Asp | Ser | Phe | 375  |
| 1126 | ATA | GAG | AAA | TTA | TTA | AGT | GGA | AGA | CAT | CAT | GTA | ACC | AGA | GAT | AAA | 1170 |
| 376  | Ile | Glu | Lys | Leu | Leu | Ser | Gly | Arg | His | His | Val | Thr | Arg | Asp | Lys | 390  |
| 1171 | CAA | GGA | AGA | ATA | TTC | TTA | GAT | AGG | GAT | AGT | GAG | TTA | TTT | AGA | ATT | 1215 |
| 391  | Gln | Gly | Arg | Ile | Phe | Leu | Asp | Arg | Asp | Ser | Glu | Leu | Phe | Arg | Ile | 405  |
| 1216 | ATA | CTT | AAC | TTC | TTA | AGA | AAT | CCG | TTA | ACT | ATA | CCC | ATA | CCA | AAA | 1260 |
| 406  | Ile | Leu | Asn | Phe | Leu | Arg | Asn | Pro | Leu | Thr | Ile | Pro | Ile | Pro | Lys | 420  |
| 1261 | GAT | TTA | AGT | GAA | AGT | GAA | GCC | TTG | TTG | AAA | GAA | GCA | GAA | TTT | TAT | 1305 |
| 421  | Asp | Leu | Ser | Glu | Ser | Glu | Ala | Leu | Leu | Lys | Glu | Ala | Glu | Phe | Tyr | 435  |
| 1306 | GGT | ATT | AAA | TTT | TTA | CCA | TTC | CCA | TTA | GTA | TTT | TGT | ATA | GGT | GGA | 1350 |
| 436  | Gly | Ile | Lys | Phe | Leu | Pro | Phe | Pro | Leu | Val | Phe | Cys | Ile | Gly | Gly | 450  |
| 1351 | TTT | GAT | GGT | GTA | GAA | TAT | TTA | AAT | TCG | ATG | GAA | TTA | TTA | GAT | ATT | 1395 |
| 451  | Phe | Asp | Gly | Val | Glu | Tyr | Leu | Asn | Ser | Met | Glu | Leu | Leu | Asp | Ile | 465  |
| 1396 | AGT | CAA | CAA | TGC | TGG | CGT | ATG | TGT | ACA | CCT | ATG | TCT | ACC | AAA | AAA | 1440 |
| 466  | Ser | Gln | Gln | Cys | Trp | Arg | Met | Cys | Thr | Pro | Met | Ser | Thr | Lys | Lys | 480  |
| 1441 | GCT | TAT | TTT | GGA | AGT | GCT | GTA | TTG | AAT | AAT | TTC | TTA | TAC | GTT | TTT | 1485 |
| 481  | Ala | Tyr | Phe | Gly | Ser | Ala | Val | Leu | Asn | Asn | Phe | Leu | Tyr | Val | Phe | 495  |

|      |     |     |     |     |     |     |     |     |     |     |     |     |     |     |     |      |
|------|-----|-----|-----|-----|-----|-----|-----|-----|-----|-----|-----|-----|-----|-----|-----|------|
| 1486 | GGT | GGT | AAT | AAC | TAT | GAT | TAT | AAG | GCT | TTA | TTT | GAA | ACT | GAG | GTG | 1530 |
| 496  | Gly | Gly | Asn | Asn | Tyr | Asp | Tyr | Lys | Ala | Leu | Phe | Glu | Thr | Glu | Val | 510  |
| 1531 | TAT | GAT | CGT | TTA | AGA | GAT | GTA | TGG | TAT | GTT | TCA | AGT | AAT | TTA | AAT | 1575 |
| 511  | Tyr | Asp | Arg | Leu | Arg | Asp | Val | Trp | Tyr | Val | Ser | Ser | Asn | Leu | Asn | 525  |
| 1576 | ATA | CCT | AGA | AGA | AAT | AAT | TGT | GGT | GTT | ACG | TCA | AAT | GGT | AGA | ATT | 1620 |
| 526  | Ile | Pro | Arg | Arg | Asn | Asn | Cys | Gly | Val | Thr | Ser | Asn | Gly | Arg | Ile | 540  |
| 1621 | TAT | TGT | ATT | GGG | GGA | TAT | GAT | GGC | TCT | TCT | ATT | ATA | CCG | AAT | GTA | 1665 |
| 541  | Tyr | Cys | Ile | Gly | Gly | Tyr | Asp | Gly | Ser | Ser | Ile | Ile | Pro | Asn | Val | 555  |
| 1666 | GAA | GCA | TAT | GAT | CAT | CGT | ATG | AAA | GCA | TGG | GTA | GAG | GTG | GCA | CCT | 1710 |
| 556  | Glu | Ala | Tyr | Asp | His | Arg | Met | Lys | Ala | Trp | Val | Glu | Val | Ala | Pro | 570  |
| 1711 | TTG | AAT | ACC | CCT | AGA | TCA | TCA | GCT | ATG | TGT | GTT | GCT | TTT | GAT | AAT | 1755 |
| 571  | Leu | Asn | Thr | Pro | Arg | Ser | Ser | Ala | Met | Cys | Val | Ala | Phe | Asp | Asn | 585  |
| 1756 | AAA | ATT | TAT | GTC | ATT | GGT | GGA | ACT | AAT | GGT | GAG | AGA | TTA | AAT | TCT | 1800 |
| 586  | Lys | Ile | Tyr | Val | Ile | Gly | Gly | Thr | Asn | Gly | Glu | Arg | Leu | Asn | Ser | 600  |
| 1801 | ATT | GAA | GTA | TAT | GAA | GAA | AAA | ATG | AAT | AAA | TGG | GAA | CAA | TTT | CCA | 1845 |
| 601  | Ile | Glu | Val | Tyr | Glu | Glu | Lys | Met | Asn | Lys | Trp | Glu | Gln | Phe | Pro | 615  |
| 1846 | TAT | GCC | TTA | TTA | GAA | GCT | AGA | AGT | TCA | GGA | GCA | GCT | TTT | AAT | TAC | 1890 |
| 616  | Tyr | Ala | Leu | Leu | Glu | Ala | Arg | Ser | Ser | Gly | Ala | Ala | Phe | Asn | Tyr | 630  |
| 1891 | CTT | AAT | CAA | ATA | TAT | GTT | GTT | GGA | GGT | ATT | GAT | AAT | GAA | CAT | AAC | 1935 |
| 631  | Leu | Asn | Gln | Ile | Tyr | Val | Val | Gly | Gly | Ile | Asp | Asn | Glu | His | Asn | 645  |
| 1936 | ATA | TTA | GAT | TCC | GTT | GAA | CAA | TAT | CAA | CCA | TTT | AAT | AAA | AGA | TGG | 1980 |
| 646  | Ile | Leu | Asp | Ser | Val | Glu | Gln | Tyr | Gln | Pro | Phe | Asn | Lys | Arg | Trp | 660  |

>18\_K13\_Sample 1

|     |     |     |     |     |     |     |     |     |     |     |     |     |     |     |     |     |
|-----|-----|-----|-----|-----|-----|-----|-----|-----|-----|-----|-----|-----|-----|-----|-----|-----|
| 1   | ATG | GAA | GGA | GAA | AAA | GTA | AAA | ACA | AAA | GCA | AAT | AGT | ATC | TCG | AAT | 45  |
| 1   | Met | Glu | Gly | Glu | Lys | Val | Lys | Thr | Lys | Ala | Asn | Ser | Ile | Ser | Asn | 15  |
| 46  | TTT | TCT | ATG | ACG | TAT | GAT | AGG | GAA | TCT | GGT | GGT | AAC | AGC | AAT | AGT | 90  |
| 16  | Phe | Ser | Met | Thr | Tyr | Asp | Arg | Glu | Ser | Gly | Gly | Asn | Ser | Asn | Ser | 30  |
| 91  | GAT | GAT | AAA | AGC | GGA | AGT | AGT | AGC | GAG | AAT | GAT | TCT | AAT | TCA | TTT | 135 |
| 31  | Asp | Asp | Lys | Ser | Gly | Ser | Ser | Ser | Glu | Asn | Asp | Ser | Asn | Ser | Phe | 45  |
| 136 | ATG | AAT | CTA | ACT | AGT | GAT | AAA | AAT | GAG | AAA | ACG | GAA | AAT | AAT | AGT | 180 |
| 46  | Met | Asn | Leu | Thr | Ser | Asp | Lys | Asn | Glu | Lys | Thr | Glu | Asn | Asn | Ser | 60  |
| 181 | TTC | CTT | TTA | AAT | AAT | AGT | AGT | TAT | GGA | AAT | GTT | AAA | GAT | AGC | CTA | 225 |
| 61  | Phe | Leu | Leu | Asn | Asn | Ser | Ser | Tyr | Gly | Asn | Val | Lys | Asp | Ser | Leu | 75  |
| 226 | TTA | GAA | TCC | ATT | GAT | ATG | AGT | GTA | TTA | GAT | TCG | AAC | TTT | GAT | AGT | 270 |
| 76  | Leu | Glu | Ser | Ile | Asp | Met | Ser | Val | Leu | Asp | Ser | Asn | Phe | Asp | Ser | 90  |

|      |     |     |     |     |     |     |     |     |     |     |     |     |     |     |     |      |
|------|-----|-----|-----|-----|-----|-----|-----|-----|-----|-----|-----|-----|-----|-----|-----|------|
| 271  | AAA | AAA | GAT | TTT | TTA | CCA | AGT | AAT | TTA | TCA | AGA | ACA | TTT | AAT | AAT | 315  |
| 91   | Lys | Lys | Asp | Phe | Leu | Pro | Ser | Asn | Leu | Ser | Arg | Thr | Phe | Asn | Asn | 105  |
| 316  | ATG | TCT | AAA | GAT | AAT | ATA | GGA | AAT | AAA | TAT | TTA | AAT | AAA | TTG | TTA | 360  |
| 106  | Met | Ser | Lys | Asp | Asn | Ile | Gly | Asn | Lys | Tyr | Leu | Asn | Lys | Leu | Leu | 120  |
| 361  | AAT | AAA | AAA | AAA | GAT | ACT | ATT | ACA | AAT | GAA | AAT | AAT | AAT | ATT | AAT | 405  |
| 121  | Asn | Lys | Lys | Lys | Asp | Thr | Ile | Thr | Asn | Glu | Asn | Asn | Asn | Ile | Asn | 135  |
| 406  | CAT | AAT | AAT | AAT | AAT | AAT | AAT | CTG | ACA | GCA | AAT | AAT | ATA | ACT | AAT | 450  |
| 136  | His | Asn | Asn | Asn | Asn | Asn | Asn | Leu | Thr | Ala | Asn | Asn | Ile | Thr | Asn | 150  |
| 451  | AAT | CTT | ATT | AAT | AAT | AAT | ATG | AAT | TCT | CCA | TCA | ATT | ATG | AAT | ACC | 495  |
| 151  | Asn | Leu | Ile | Asn | Asn | Asn | Met | Asn | Ser | Pro | Ser | Ile | Met | Asn | Thr | 165  |
| 496  | AAC | AAA | AAA | GAG | AAT | TTT | TTA | GAT | GCA | GCA | AAT | CTT | ATA | AAT | GAT | 540  |
| 166  | Asn | Lys | Lys | Glu | Asn | Phe | Leu | Asp | Ala | Ala | Asn | Leu | Ile | Asn | Asp | 180  |
| 541  | GAT | TCT | GGA | TTA | AAC | AAT | TTA | AAA | AAA | TTT | TCA | ACT | GTA | AAT | AAT | 585  |
| 181  | Asp | Ser | Gly | Leu | Asn | Asn | Leu | Lys | Lys | Phe | Ser | Thr | Val | Asn | Asn | 195  |
| 586  | GTA | AAT | GAT | ACT | TAT | GAA | AAG | AAA | ATT | ATT | GAA | ACG | GAA | TTA | AGT | 630  |
| 196  | Val | Asn | Asp | Thr | Tyr | Glu | Lys | Lys | Ile | Ile | Glu | Thr | Glu | Leu | Ser | 210  |
| 631  | GAT | GCT | AGT | GAT | TTT | GAA | AAT | ATG | GTA | GGT | GAT | TTA | AGA | ATT | ACA | 675  |
| 211  | Asp | Ala | Ser | Asp | Phe | Glu | Asn | Met | Val | Gly | Asp | Leu | Arg | Ile | Thr | 225  |
| 676  | TTT | ATT | AAT | TGG | TTA | AAA | AAG | ACA | CAA | ATG | AAT | TTT | ATT | CGA | GAA | 720  |
| 226  | Phe | Ile | Asn | Trp | Leu | Lys | Lys | Thr | Gln | Met | Asn | Phe | Ile | Arg | Glu | 240  |
| 721  | AAA | GAT | AAA | TTA | TTT | AAA | GAT | AAG | AAA | GAA | CTA | GAA | ATG | GAA | AGA | 765  |
| 241  | Lys | Asp | Lys | Leu | Phe | Lys | Asp | Lys | Lys | Glu | Leu | Glu | Met | Glu | Arg | 255  |
| 766  | GTA | CGA | TTG | TAC | AAA | GAA | TTA | GAA | AAC | CGT | AAA | AAT | ATT | GAA | GAA | 810  |
| 256  | Val | Arg | Leu | Tyr | Lys | Glu | Leu | Glu | Asn | Arg | Lys | Asn | Ile | Glu | Glu | 270  |
| 811  | CAG | AAA | TTA | CAT | GAT | GAA | AGA | AAG | AAA | TTA | GAT | ATT | GAT | ATA | TCT | 855  |
| 271  | Gln | Lys | Leu | His | Asp | Glu | Arg | Lys | Lys | Leu | Asp | Ile | Asp | Ile | Ser | 285  |
| 856  | AAT | GGT | TAT | AAA | CAA | ATA | AAA | AAA | GAA | AAA | GAA | GAA | CAT | AGG | AAA | 900  |
| 286  | Asn | Gly | Tyr | Lys | Gln | Ile | Lys | Lys | Glu | Lys | Glu | Glu | His | Arg | Lys | 300  |
| 901  | CGA | TTT | GAT | GAA | GAA | AGA | TTA | AGA | TTT | TTA | CAA | GAA | ATC | GAT | AAA | 945  |
| 301  | Arg | Phe | Asp | Glu | Glu | Arg | Leu | Arg | Phe | Leu | Gln | Glu | Ile | Asp | Lys | 315  |
| 946  | ATT | AAA | TTA | GTA | TTA | TAT | TTA | GAA | AAA | GAA | AAA | TAT | TAT | CAA | GAA | 990  |
| 316  | Ile | Lys | Leu | Val | Leu | Tyr | Leu | Glu | Lys | Glu | Lys | Tyr | Tyr | Gln | Glu | 330  |
| 991  | TAT | AAA | AAT | TTT | GAG | AAT | GAT | AAA | AAA | AAA | ATT | GTT | GAT | GCA | AAT | 1035 |
| 331  | Tyr | Lys | Asn | Phe | Glu | Asn | Asp | Lys | Lys | Lys | Ile | Val | Asp | Ala | Asn | 345  |
| 1036 | ATT | GCT | ACT | GAA | ACT | ATG | ATT | GAT | ATT | AAT | GTT | GGT | GGA | GCT | ATT | 1080 |
| 346  | Ile | Ala | Thr | Glu | Thr | Met | Ile | Asp | Ile | Asn | Val | Gly | Gly | Ala | Ile | 360  |

|      |     |     |     |     |     |     |     |     |     |     |     |     |     |     |     |      |
|------|-----|-----|-----|-----|-----|-----|-----|-----|-----|-----|-----|-----|-----|-----|-----|------|
| 1081 | TTT | GAA | ACA | TCT | AGA | CAT | ACC | TTA | ACA | CAA | CAA | AAA | GAT | TCA | TTT | 1125 |
| 361  | Phe | Glu | Thr | Ser | Arg | His | Thr | Leu | Thr | Gln | Gln | Lys | Asp | Ser | Phe | 375  |
| 1126 | ATA | GAG | AAA | TTA | TTA | AGT | GGA | AGA | CAT | CAT | GTA | ACC | AGA | GAT | AAA | 1170 |
| 376  | Ile | Glu | Lys | Leu | Leu | Ser | Gly | Arg | His | His | Val | Thr | Arg | Asp | Lys | 390  |
| 1171 | CAA | GGA | AGA | ATA | TTC | TTA | GAT | AGG | GAT | AGT | GAG | TTA | TTT | AGA | ATT | 1215 |
| 391  | Gln | Gly | Arg | Ile | Phe | Leu | Asp | Arg | Asp | Ser | Glu | Leu | Phe | Arg | Ile | 405  |
| 1216 | ATA | CTT | AAC | TTC | TTA | AGA | AAT | CCG | TTA | ACT | ATA | CCC | ATA | CCA | AAA | 1260 |
| 406  | Ile | Leu | Asn | Phe | Leu | Arg | Asn | Pro | Leu | Thr | Ile | Pro | Ile | Pro | Lys | 420  |
| 1261 | GAT | TTA | AGT | GAA | AGT | GAA | GCC | TTG | TTG | AAA | GAA | GCA | GAA | TTT | TAT | 1305 |
| 421  | Asp | Leu | Ser | Glu | Ser | Glu | Ala | Leu | Leu | Lys | Glu | Ala | Glu | Phe | Tyr | 435  |
| 1306 | GGT | ATT | AAA | TTT | TTA | CCA | TTC | CCA | TTA | GTA | TTT | TGT | ATA | GGT | GGA | 1350 |
| 436  | Gly | Ile | Lys | Phe | Leu | Pro | Phe | Pro | Leu | Val | Phe | Cys | Ile | Gly | Gly | 450  |
| 1351 | TTT | GAT | GGT | GTA | GAA | TAT | TTA | AAT | TCG | ATG | GAA | TTA | TTA | GAT | ATT | 1395 |
| 451  | Phe | Asp | Gly | Val | Glu | Tyr | Leu | Asn | Ser | Met | Glu | Leu | Leu | Asp | Ile | 465  |
| 1396 | AGT | CAA | CAA | TGC | TGG | CGT | ATG | TGT | ACA | CCT | ATG | TCT | ACC | AAA | AAA | 1440 |
| 466  | Ser | Gln | Gln | Cys | Trp | Arg | Met | Cys | Thr | Pro | Met | Ser | Thr | Lys | Lys | 480  |
| 1441 | GCT | TAT | TTT | GGA | AGT | GCT | GTA | TTG | AAT | AAT | TTC | TTA | TAC | GTT | TTT | 1485 |
| 481  | Ala | Tyr | Phe | Gly | Ser | Ala | Val | Leu | Asn | Asn | Phe | Leu | Tyr | Val | Phe | 495  |
| 1486 | GGT | GGT | AAT | AAC | TAT | GAT | TAT | AAG | GCT | TTA | TTT | GAA | ACT | GAA | GTG | 1530 |
| 496  | Gly | Gly | Asn | Asn | Tyr | Asp | Tyr | Lys | Ala | Leu | Phe | Glu | Thr | Glu | Val | 510  |
| 1531 | TAT | GAT | CGT | TTA | AGA | GAT | GTA | TGG | TAT | GTT | TCA | AGT | AAT | TTA | AAT | 1575 |
| 511  | Tyr | Asp | Arg | Leu | Arg | Asp | Val | Trp | Tyr | Val | Ser | Ser | Asn | Leu | Asn | 525  |
| 1576 | ATA | CCT | AGA | AGA | AAT | AAT | TGT | GGT | GTT | ACG | TCA | AAT | GGT | AGA | ATT | 1620 |
| 526  | Ile | Pro | Arg | Arg | Asn | Asn | Cys | Gly | Val | Thr | Ser | Asn | Gly | Arg | Ile | 540  |
| 1621 | TAT | TGT | ATT | GGG | GGA | TAT | GAT | GGC | TCT | TCT | ATT | ATA | CCG | AAT | GTA | 1665 |
| 541  | Tyr | Cys | Ile | Gly | Gly | Tyr | Asp | Gly | Ser | Ser | Ile | Ile | Pro | Asn | Val | 555  |
| 1666 | GAA | GCA | TAT | GAT | CAT | CGT | ATG | AAA | GCA | TGG | GTA | GAG | GTG | GCA | CCT | 1710 |
| 556  | Glu | Ala | Tyr | Asp | His | Arg | Met | Lys | Ala | Trp | Val | Glu | Val | Ala | Pro | 570  |
| 1711 | TTG | AAT | ACC | CCT | AGA | TCA | TCA | GCT | ATG | TGT | GTT | GCT | TTT | GAT | AAT | 1755 |
| 571  | Leu | Asn | Thr | Pro | Arg | Ser | Ser | Ala | Met | Cys | Val | Ala | Phe | Asp | Asn | 585  |
| 1756 | AAA | ATT | TAT | GTC | ATT | GGT | GGA | ACT | AAT | GGT | GAG | AGG | TTA | AAT | TCT | 1800 |
| 586  | Lys | Ile | Tyr | Val | Ile | Gly | Gly | Thr | Asn | Gly | Glu | Arg | Leu | Asn | Ser | 600  |
| 1801 | ATT | GAA | GTA | TAA | GAA | GAA | AAA | ATG | AAT | AAA | TGG | GAA | CAA | TTT | CCA | 1845 |
| 601  | Ile | Glu | Val | End | Glu | Glu | Lys | Met | Asn | Lys | Trp | Glu | Gln | Phe | Pro | 615  |
| 1846 | TAT | GCC | TTA | TTA | GAA | GCT | AGA | AGT | TCA | GGA | GCA | GCT | TTT | AAT | TAC | 1890 |

616 Tyr Ala Leu Leu Glu Ala Arg Ser Ser Gly Ala Ala Phe Asn Tyr 630

1891 CTT AAT CAA ATA TAT GTT GTT GGA GGT ATT 1920

631 Leu Asn Gln Ile Tyr Val Val Gly Gly Ile 640

>19\_K13\_Sample 2

1 ATG GAA GGA GAA AAA GTA AAA ACA AAA GCA AAT AGT ATC TCG AAT 45

1 Met Glu Gly Glu Lys Val Lys Thr Lys Ala Asn Ser Ile Ser Asn 15

46 TTT TCT ATG ACG TAT GAT AGG GAA TCT GGT GGT AAC AGC AAT AGT 90

16 Phe Ser Met Thr Tyr Asp Arg Glu Ser Gly Gly Asn Ser Asn Ser 30

91 GAT GAT AAA AGC GGA AGT AGT AGC GAG AAT GAT TCT AAT TCA TTT 135

31 Asp Asp Lys Ser Gly Ser Ser Ser Glu Asn Asp Ser Asn Ser Phe 45

136 ATG AAT CTA ACT AGT GAT AAA AAT GAG AAA ACG GAA AAT AAT AGT 180

46 Met Asn Leu Thr Ser Asp Lys Asn Glu Lys Thr Glu Asn Asn Ser 60

181 TTC CTT TTA AAT AAT AGT AGT TAT GGA AAT GTT AAA GAT AGC CTA 225

61 Phe Leu Leu Asn Asn Ser Ser Tyr Gly Asn Val Lys Asp Ser Leu 75

226 TTA GAA TCC ATT GAT ATG AGT GTA TTA GAT TCG AAC TTT GAT AGT 270

76 Leu Glu Ser Ile Asp Met Ser Val Leu Asp Ser Asn Phe Asp Ser 90

271 AAA AAA GAT TTT TTA CCA AGT AAT TTA TCA AGA ACA TTT AAT AAT 315

91 Lys Lys Asp Phe Leu Pro Ser Asn Leu Ser Arg Thr Phe Asn Asn 105

316 ATG TCT AAA GAT AAT ATA GGA AAT AAA TAT TTA AAT AAA TTG TTA 360

106 Met Ser Lys Asp Asn Ile Gly Asn Lys Tyr Leu Asn Lys Leu Leu 120

361 AAT AAA AAA AAA GAT ACT ATT ACA AAT GAA AAT AAT AAT ATT AAT 405

121 Asn Lys Lys Lys Asp Thr Ile Thr Asn Glu Asn Asn Asn Ile Asn 135

406 CAT AAT AAT AAT AAT AAT AAT CTG ACA GCA AAT AAT ATA ACT AAT 450

136 His Asn Asn Asn Asn Asn Asn Leu Thr Ala Asn Asn Ile Thr Asn 150

451 AAT CTT ATT AAT AAT AAT ATG AAT TCT CCA TCA ATT ATG AAT ACC 495

151 Asn Leu Ile Asn Asn Asn Met Asn Ser Pro Ser Ile Met Asn Thr 165

496 AAC AAA AAA GAG AAT TTT TTA GAT GCA GCA AAT CTT ATA AAT GAT 540

166 Asn Lys Lys Glu Asn Phe Leu Asp Ala Ala Asn Leu Ile Asn Asp 180

541 GAT TCT GGA TTA AAC AAT TTA AAA AAA TTT TCA ACT GTA AAT AAT 585

181 Asp Ser Gly Leu Asn Asn Leu Lys Lys Phe Ser Thr Val Asn Asn 195

586 GTA AAT GAT ACT TAT GAA AAG AAA ATT ATT GAA ACG GAA TTA AGT 630

196 Val Asn Asp Thr Tyr Glu Lys Lys Ile Ile Glu Thr Glu Leu Ser 210

631 GAT GCT AGT GAT TTT GAA AAT ATG GTA GGT GAT TTA AGA ATT ACA 675

211 Asp Ala Ser Asp Phe Glu Asn Met Val Gly Asp Leu Arg Ile Thr 225

676 TTT ATT AAT TGG TTA AAA AAG ACA CAA ATG AAT TTT ATT CGA GAA 720

|      |     |     |     |     |     |     |     |     |     |     |     |     |     |     |     |      |
|------|-----|-----|-----|-----|-----|-----|-----|-----|-----|-----|-----|-----|-----|-----|-----|------|
| 226  | Phe | Ile | Asn | Trp | Leu | Lys | Lys | Thr | Gln | Met | Asn | Phe | Ile | Arg | Glu | 240  |
| 721  | AAA | GAT | AAA | TTA | TTT | AAA | GAT | AAG | AAA | GAA | CTA | GAA | ATG | GAA | AGA | 765  |
| 241  | Lys | Asp | Lys | Leu | Phe | Lys | Asp | Lys | Lys | Glu | Leu | Glu | Met | Glu | Arg | 255  |
| 766  | GTA | CGA | TTG | TAC | AAA | GAA | TTA | GAA | AAC | CGT | AAA | AAT | ATT | GAA | GAA | 810  |
| 256  | Val | Arg | Leu | Tyr | Lys | Glu | Leu | Glu | Asn | Arg | Lys | Asn | Ile | Glu | Glu | 270  |
| 811  | CAG | AAA | TTA | CAT | GAT | GAA | AGA | AAG | AAA | TTA | GAT | ATT | GAT | ATA | TCT | 855  |
| 271  | Gln | Lys | Leu | His | Asp | Glu | Arg | Lys | Lys | Leu | Asp | Ile | Asp | Ile | Ser | 285  |
| 856  | AAT | GGT | TAT | AAA | CAA | ATA | AAA | AAA | GAA | AAA | GAA | GAA | CAT | AGG | AAA | 900  |
| 286  | Asn | Gly | Tyr | Lys | Gln | Ile | Lys | Lys | Glu | Lys | Glu | Glu | His | Arg | Lys | 300  |
| 901  | CGA | TTT | GAT | GAA | GAA | AGA | TTA | AGA | TTT | TTA | CAA | GAA | ATC | GAT | AAA | 945  |
| 301  | Arg | Phe | Asp | Glu | Glu | Arg | Leu | Arg | Phe | Leu | Gln | Glu | Ile | Asp | Lys | 315  |
| 946  | ATT | AAA | TTA | GTA | TTA | TAT | TTA | GAA | AAA | GAA | AAA | TAT | TAT | CAA | GAA | 990  |
| 316  | Ile | Lys | Leu | Val | Leu | Tyr | Leu | Glu | Lys | Glu | Lys | Tyr | Tyr | Gln | Glu | 330  |
| 991  | TAT | AAA | AAT | TTT | GAG | AAT | GAT | AAA | AAA | AAA | ATT | GTT | GAT | GCA | AAT | 1035 |
| 331  | Tyr | Lys | Asn | Phe | Glu | Asn | Asp | Lys | Lys | Lys | Ile | Val | Asp | Ala | Asn | 345  |
| 1036 | ATT | GCT | ACT | GAA | ACT | ATG | ATT | GAT | ATT | AAT | GTT | GGT | GGA | GCT | ATT | 1080 |
| 346  | Ile | Ala | Thr | Glu | Thr | Met | Ile | Asp | Ile | Asn | Val | Gly | Gly | Ala | Ile | 360  |
| 1081 | TTT | GAA | ACA | TCT | AGA | CAT | ACC | TTA | ACA | CAA | CAA | AAA | GAT | TCA | TTT | 1125 |
| 361  | Phe | Glu | Thr | Ser | Arg | His | Thr | Leu | Thr | Gln | Gln | Lys | Asp | Ser | Phe | 375  |
| 1126 | ATA | GAG | AAA | TTA | TTA | AGT | GGA | AGA | CAT | CAT | GTA | ACC | AGA | GAT | AAA | 1170 |
| 376  | Ile | Glu | Lys | Leu | Leu | Ser | Gly | Arg | His | His | Val | Thr | Arg | Asp | Lys | 390  |
| 1171 | CAA | GGA | AGA | ATA | TTC | TTA | GAT | AGG | GAT | AGT | GAG | TTA | TTT | AGA | ATT | 1215 |
| 391  | Gln | Gly | Arg | Ile | Phe | Leu | Asp | Arg | Asp | Ser | Glu | Leu | Phe | Arg | Ile | 405  |
| 1216 | ATA | CTT | AAC | TTC | TTA | AGA | AAT | CCG | TTA | ACT | ATA | CCC | ATA | CCA | AAA | 1260 |
| 406  | Ile | Leu | Asn | Phe | Leu | Arg | Asn | Pro | Leu | Thr | Ile | Pro | Ile | Pro | Lys | 420  |
| 1261 | GAT | TTA | AGT | GAA | AGT | GAA | GCC | TTG | TTG | AAA | GAA | GCA | GAA | TTT | TAT | 1305 |
| 421  | Asp | Leu | Ser | Glu | Ser | Glu | Ala | Leu | Leu | Lys | Glu | Ala | Glu | Phe | Tyr | 435  |
| 1306 | GGT | ATT | AAA | TTT | TTA | CCA | TTC | CCA | TTA | GTA | TTT | TGT | ATA | GGT | GGA | 1350 |
| 436  | Gly | Ile | Lys | Phe | Leu | Pro | Phe | Pro | Leu | Val | Phe | Cys | Ile | Gly | Gly | 450  |
| 1351 | TTT | GAT | GGT | GTA | GAA | TAT | TTA | AAT | TCG | ATG | GAA | TTA | TTA | GAT | ATT | 1395 |
| 451  | Phe | Asp | Gly | Val | Glu | Tyr | Leu | Asn | Ser | Met | Glu | Leu | Leu | Asp | Ile | 465  |
| 1396 | AGT | CAA | CAA | TGC | TGG | CGT | ATG | TGT | ACA | CCT | ATG | TCT | ACC | AAA | AAA | 1440 |
| 466  | Ser | Gln | Gln | Cys | Trp | Arg | Met | Cys | Thr | Pro | Met | Ser | Thr | Lys | Lys | 480  |
| 1441 | GCT | TAT | TTT | GGA | AGT | GCT | GTA | TTG | AAT | AAT | TTC | TTA | TAC | GTT | TTT | 1485 |
| 481  | Ala | Tyr | Phe | Gly | Ser | Ala | Val | Leu | Asn | Asn | Phe | Leu | Tyr | Val | Phe | 495  |

|      |     |     |     |     |     |     |     |     |     |     |     |     |     |     |     |      |
|------|-----|-----|-----|-----|-----|-----|-----|-----|-----|-----|-----|-----|-----|-----|-----|------|
| 1486 | GGT | GGT | AAT | AAC | TAT | GAT | TAT | AAG | GCT | TTA | TTT | GAA | ACT | GAG | GTG | 1530 |
| 496  | Gly | Gly | Asn | Asn | Tyr | Asp | Tyr | Lys | Ala | Leu | Phe | Glu | Thr | Glu | Val | 510  |
|      |     |     |     |     |     |     |     |     |     |     |     |     |     |     |     |      |
| 1531 | TAT | GAT | CGT | TTA | AGA | GAT | GTA | TGG | TAT | GTT | TCA | AGT | AAT | TTA | AAT | 1575 |
| 511  | Tyr | Asp | Arg | Leu | Arg | Asp | Val | Trp | Tyr | Val | Ser | Ser | Asn | Leu | Asn | 525  |
|      |     |     |     |     |     |     |     |     |     |     |     |     |     |     |     |      |
| 1576 | ATA | CCT | AGA | AGA | AAT | AAT | TGT | TGT | GTT | ACG | TCA | AAT | GGT | AGA | ATT | 1620 |
| 526  | Ile | Pro | Arg | Arg | Asn | Asn | Cys | Cys | Val | Thr | Ser | Asn | Gly | Arg | Ile | 540  |
|      |     |     |     |     |     |     |     |     |     |     |     |     |     |     |     |      |
| 1621 | TAT | TGT | ATT | GGG | GGA | TAT | GAT | GGC | TCT | TCT | ATT | ATA | CCG | AAT | GTA | 1665 |
| 541  | Tyr | Cys | Ile | Gly | Gly | Tyr | Asp | Gly | Ser | Ser | Ile | Ile | Pro | Asn | Val | 555  |
|      |     |     |     |     |     |     |     |     |     |     |     |     |     |     |     |      |
| 1666 | GAA | GCA | TAT | GAT | CAT | CGT | ATG | AAA | GCA | TGG | GTA | GAG | GTG | GCA | CCT | 1710 |
| 556  | Glu | Ala | Tyr | Asp | His | Arg | Met | Lys | Ala | Trp | Val | Glu | Val | Ala | Pro | 570  |
|      |     |     |     |     |     |     |     |     |     |     |     |     |     |     |     |      |
| 1711 | TTG | AAT | ACC | CCT | AGA | TCA | TCA | GCT | ATG | TGT | GTT | GCT | TTT | GAT | AAT | 1755 |
| 571  | Leu | Asn | Thr | Pro | Arg | Ser | Ser | Ala | Met | Cys | Val | Ala | Phe | Asp | Asn | 585  |
|      |     |     |     |     |     |     |     |     |     |     |     |     |     |     |     |      |
| 1756 | AAA | ATT | TAT | GTC | ATT | GGT | GGA | ACT | AAT | GGT | GAG | AGA | TTA | AAT | TCT | 1800 |
| 586  | Lys | Ile | Tyr | Val | Ile | Gly | Gly | Thr | Asn | Gly | Glu | Arg | Leu | Asn | Ser | 600  |
|      |     |     |     |     |     |     |     |     |     |     |     |     |     |     |     |      |
| 1801 | ATT | GAA | GTA | TAT | GAA | GAA | AAA | ATG | AAT | AAA | TGG | GAA | CAA | TTT | CCA | 1845 |
| 601  | Ile | Glu | Val | Tyr | Glu | Glu | Lys | Met | Asn | Lys | Trp | Glu | Gln | Phe | Pro | 615  |
|      |     |     |     |     |     |     |     |     |     |     |     |     |     |     |     |      |
| 1846 | TAT | GCC | TTA | TTA | GAA | GCT | AGA | AGT | TCA | GGA | GCA | GCT | TTT | AAT | TAC | 1890 |
| 616  | Tyr | Ala | Leu | Leu | Glu | Ala | Arg | Ser | Ser | Gly | Ala | Ala | Phe | Asn | Tyr | 630  |
|      |     |     |     |     |     |     |     |     |     |     |     |     |     |     |     |      |
| 1891 | CTT | AAT | CAA | ATA | TAT | GTT | GTT | GGA | GGT | ATT |     |     |     |     |     | 1920 |
| 631  | Leu | Asn | Gln | Ile | Tyr | Val | Val | Gly | Gly | Ile |     |     |     |     |     | 640  |

>22\_K13\_Sample 3

|     |     |     |     |     |     |     |     |     |     |     |     |     |     |     |     |     |
|-----|-----|-----|-----|-----|-----|-----|-----|-----|-----|-----|-----|-----|-----|-----|-----|-----|
| 1   | ATG | GAA | GGA | GAA | AAA | GTA | AAA | ACA | AAA | GCA | AAT | AGT | ATC | TCG | AAT | 45  |
| 1   | Met | Glu | Gly | Glu | Lys | Val | Lys | Thr | Lys | Ala | Asn | Ser | Ile | Ser | Asn | 15  |
|     |     |     |     |     |     |     |     |     |     |     |     |     |     |     |     |     |
| 46  | TTT | TCT | ATG | ACG | TAT | GAT | AGG | GAA | TCT | GGT | GGT | AAC | AGC | AAT | AGT | 90  |
| 16  | Phe | Ser | Met | Thr | Tyr | Asp | Arg | Glu | Ser | Gly | Gly | Asn | Ser | Asn | Ser | 30  |
|     |     |     |     |     |     |     |     |     |     |     |     |     |     |     |     |     |
| 91  | GAT | GAT | AAA | AGC | GGA | AGT | AGT | AGC | GAG | AAT | GAT | TCT | AAT | TCA | TTT | 135 |
| 31  | Asp | Asp | Lys | Ser | Gly | Ser | Ser | Ser | Glu | Asn | Asp | Ser | Asn | Ser | Phe | 45  |
|     |     |     |     |     |     |     |     |     |     |     |     |     |     |     |     |     |
| 136 | ATG | AAT | CTA | ACT | AGT | GAT | AAA | AAT | GAG | AAA | ACG | GAA | AAT | AAT | AGT | 180 |
| 46  | Met | Asn | Leu | Thr | Ser | Asp | Lys | Asn | Glu | Lys | Thr | Glu | Asn | Asn | Ser | 60  |
|     |     |     |     |     |     |     |     |     |     |     |     |     |     |     |     |     |
| 181 | TTC | CTT | TTA | AAT | AAT | AGT | AGT | TAT | GGA | AAT | GTT | AAA | GAT | AGC | CTA | 225 |
| 61  | Phe | Leu | Leu | Asn | Asn | Ser | Ser | Tyr | Gly | Asn | Val | Lys | Asp | Ser | Leu | 75  |
|     |     |     |     |     |     |     |     |     |     |     |     |     |     |     |     |     |
| 226 | TTA | GAA | TCC | ATT | GAT | ATG | AGT | GTA | TTA | GAT | TCG | AAC | TTT | GAT | AGT | 270 |
| 76  | Leu | Glu | Ser | Ile | Asp | Met | Ser | Val | Leu | Asp | Ser | Asn | Phe | Asp | Ser | 90  |
|     |     |     |     |     |     |     |     |     |     |     |     |     |     |     |     |     |
| 271 | AAA | AAA | GAT | TTT | TTA | CCA | AGT | AAT | TTA | TCA | AGA | ACA | TTT | AAT | AAT | 315 |
| 91  | Lys | Lys | Asp | Phe | Leu | Pro | Ser | Asn | Leu | Ser | Arg | Thr | Phe | Asn | Asn | 105 |

|      |     |     |     |     |     |     |     |     |     |     |     |     |     |     |     |      |
|------|-----|-----|-----|-----|-----|-----|-----|-----|-----|-----|-----|-----|-----|-----|-----|------|
| 316  | ATG | TCT | AAA | GAT | AAT | ATA | GGA | AAT | AAA | TAT | TTA | AAT | AAA | TTG | TTA | 360  |
| 106  | Met | Ser | Lys | Asp | Asn | Ile | Gly | Asn | Lys | Tyr | Leu | Asn | Lys | Leu | Leu | 120  |
| 361  | AAT | AAA | AAA | AAA | GAT | ACT | ATT | ACA | AAT | GAA | AAT | AAT | AAT | ATT | AAT | 405  |
| 121  | Asn | Lys | Lys | Lys | Asp | Thr | Ile | Thr | Asn | Glu | Asn | Asn | Asn | Ile | Asn | 135  |
| 406  | CAT | AAT | AAT | AAT | AAT | AAT | AAT | CTG | ACA | GCA | AAT | AAT | ATA | ACT | AAT | 450  |
| 136  | His | Asn | Asn | Asn | Asn | Asn | Asn | Leu | Thr | Ala | Asn | Asn | Ile | Thr | Asn | 150  |
| 451  | AAT | CTT | ATT | AAT | AAT | AAT | ATG | AAT | TCT | CCA | TCA | ATT | ATG | AAT | ACC | 495  |
| 151  | Asn | Leu | Ile | Asn | Asn | Asn | Met | Asn | Ser | Pro | Ser | Ile | Met | Asn | Thr | 165  |
| 496  | AAC | AAA | AAA | GAG | AAT | TTT | TTA | GAT | GCA | GCA | AAT | CTT | ATA | AAT | GAT | 540  |
| 166  | Asn | Lys | Lys | Glu | Asn | Phe | Leu | Asp | Ala | Ala | Asn | Leu | Ile | Asn | Asp | 180  |
| 541  | GAT | TCT | GGA | TTA | AAC | AAT | TTA | AAA | AAA | TTT | TCA | ACT | GTA | AAT | AAT | 585  |
| 181  | Asp | Ser | Gly | Leu | Asn | Asn | Leu | Lys | Lys | Phe | Ser | Thr | Val | Asn | Asn | 195  |
| 586  | GTA | AAT | GAT | ACT | TAT | GAA | AAG | AAA | ATT | ATT | GAA | ACG | GAA | TTA | AGT | 630  |
| 196  | Val | Asn | Asp | Thr | Tyr | Glu | Lys | Lys | Ile | Ile | Glu | Thr | Glu | Leu | Ser | 210  |
| 631  | GAT | GCT | AGT | GAT | TTT | GAA | AAT | ATG | GTA | GGT | GAT | TTA | AGA | ATT | ACA | 675  |
| 211  | Asp | Ala | Ser | Asp | Phe | Glu | Asn | Met | Val | Gly | Asp | Leu | Arg | Ile | Thr | 225  |
| 676  | TTT | ATT | AAT | TGG | TTA | AAA | AAG | ACA | CAA | ATG | AAT | TTT | ATT | CGA | GAA | 720  |
| 226  | Phe | Ile | Asn | Trp | Leu | Lys | Lys | Thr | Gln | Met | Asn | Phe | Ile | Arg | Glu | 240  |
| 721  | AAA | GAT | AAA | TTA | TTT | AAA | GAT | AAG | AAA | GAA | CTA | GAA | ATG | GAA | AGA | 765  |
| 241  | Lys | Asp | Lys | Leu | Phe | Lys | Asp | Lys | Lys | Glu | Leu | Glu | Met | Glu | Arg | 255  |
| 766  | GTA | CGA | TTG | TAC | AAA | GAA | TTA | GAA | AAC | CGT | AAA | AAT | ATT | GAA | GAA | 810  |
| 256  | Val | Arg | Leu | Tyr | Lys | Glu | Leu | Glu | Asn | Arg | Lys | Asn | Ile | Glu | Glu | 270  |
| 811  | CAG | AAA | TTA | CAT | GAT | GAA | AGA | AAG | AAA | TTA | GAT | ATT | GAT | ATA | TCT | 855  |
| 271  | Gln | Lys | Leu | His | Asp | Glu | Arg | Lys | Lys | Leu | Asp | Ile | Asp | Ile | Ser | 285  |
| 856  | AAT | GGT | TAT | AAA | CAA | ATA | AAA | AAA | GAA | AAA | GAA | GAA | CAT | AGG | AAA | 900  |
| 286  | Asn | Gly | Tyr | Lys | Gln | Ile | Lys | Lys | Glu | Lys | Glu | Glu | His | Arg | Lys | 300  |
| 901  | CGA | TTT | GAT | GAA | GAA | AGA | TTA | AGA | TTT | TTA | CAA | GAA | ATC | GAT | AAA | 945  |
| 301  | Arg | Phe | Asp | Glu | Glu | Arg | Leu | Arg | Phe | Leu | Gln | Glu | Ile | Asp | Lys | 315  |
| 946  | ATT | AAA | TTA | GTA | TTA | TAT | TTA | GAA | AAA | GAA | AAA | TAT | TAT | CAA | GAA | 990  |
| 316  | Ile | Lys | Leu | Val | Leu | Tyr | Leu | Glu | Lys | Glu | Lys | Tyr | Tyr | Gln | Glu | 330  |
| 991  | TAT | AAA | AAT | TTT | GAG | AAT | GAT | AAA | AAA | AAA | ATT | GTT | GAT | GCA | AAT | 1035 |
| 331  | Tyr | Lys | Asn | Phe | Glu | Asn | Asp | Lys | Lys | Lys | Ile | Val | Asp | Ala | Asn | 345  |
| 1036 | ATT | GCT | ACT | GAA | ACT | ATG | ATT | GAT | ATT | AAT | GTT | GGT | GGA | GCT | ATT | 1080 |
| 346  | Ile | Ala | Thr | Glu | Thr | Met | Ile | Asp | Ile | Asn | Val | Gly | Gly | Ala | Ile | 360  |
| 1081 | TTT | GAA | ACA | TCT | AGA | CAT | ACC | TTA | ACA | CAA | CAA | AAA | GAT | TCA | TTT | 1125 |
| 361  | Phe | Glu | Thr | Ser | Arg | His | Thr | Leu | Thr | Gln | Gln | Lys | Asp | Ser | Phe | 375  |

|      |     |     |     |     |     |     |     |     |     |     |     |     |     |     |     |      |
|------|-----|-----|-----|-----|-----|-----|-----|-----|-----|-----|-----|-----|-----|-----|-----|------|
| 1126 | ATA | GAG | AAA | TTA | TTA | AGT | GGA | AGA | CAT | CAT | GTA | ACC | AGA | GAT | AAA | 1170 |
| 376  | Ile | Glu | Lys | Leu | Leu | Ser | Gly | Arg | His | His | Val | Thr | Arg | Asp | Lys | 390  |
| 1171 | CAA | GGA | AGA | ATA | TTC | TTA | GAT | AGG | GAT | AGT | GAG | TTA | TTT | AGA | ATT | 1215 |
| 391  | Gln | Gly | Arg | Ile | Phe | Leu | Asp | Arg | Asp | Ser | Glu | Leu | Phe | Arg | Ile | 405  |
| 1216 | ATA | CTT | AAC | TTC | TTA | AGA | AAT | CCG | TTA | ACT | ATA | CCC | ATA | CCA | AAA | 1260 |
| 406  | Ile | Leu | Asn | Phe | Leu | Arg | Asn | Pro | Leu | Thr | Ile | Pro | Ile | Pro | Lys | 420  |
| 1261 | GAT | TTA | AGT | GAA | AGT | GAA | GCC | TTG | TTG | AAA | GAA | GCA | GAA | TTT | TAT | 1305 |
| 421  | Asp | Leu | Ser | Glu | Ser | Glu | Ala | Leu | Leu | Lys | Glu | Ala | Glu | Phe | Tyr | 435  |
| 1306 | GGT | ATT | AAA | TTT | TTA | CCA | TTC | CCA | TTA | GTA | TTT | TGT | ATA | GGT | GGA | 1350 |
| 436  | Gly | Ile | Lys | Phe | Leu | Pro | Phe | Pro | Leu | Val | Phe | Cys | Ile | Gly | Gly | 450  |
| 1351 | TTT | GAT | GGT | GTA | GAA | TAT | TTA | AAT | TCG | ATG | GAA | TTA | TTA | GAT | ATT | 1395 |
| 451  | Phe | Asp | Gly | Val | Glu | Tyr | Leu | Asn | Ser | Met | Glu | Leu | Leu | Asp | Ile | 465  |
| 1396 | AGT | CAA | CAA | TGC | TGG | CGT | ATG | TGT | ACA | CCT | ATG | TCT | ACC | AAA | AAA | 1440 |
| 466  | Ser | Gln | Gln | Cys | Trp | Arg | Met | Cys | Thr | Pro | Met | Ser | Thr | Lys | Lys | 480  |
| 1441 | GCT | TAT | TTT | GGA | AGT | GCT | GTA | TTG | AAT | AAT | TTC | TTA | TAC | GTT | TTT | 1485 |
| 481  | Ala | Tyr | Phe | Gly | Ser | Ala | Val | Leu | Asn | Asn | Phe | Leu | Tyr | Val | Phe | 495  |
| 1486 | GGT | GGT | AAT | AAC | TAT | GAT | TAT | AAG | GCT | TTA | TTT | GAA | ACT | GAA | GTG | 1530 |
| 496  | Gly | Gly | Asn | Asn | Tyr | Asp | Tyr | Lys | Ala | Leu | Phe | Glu | Thr | Glu | Val | 510  |
| 1531 | TAT | GAT | CGT | TTA | AGA | GAT | GTA | TGG | TAT | GTT | TCA | AGT | AAT | TTA | AAT | 1575 |
| 511  | Tyr | Asp | Arg | Leu | Arg | Asp | Val | Trp | Tyr | Val | Ser | Ser | Asn | Leu | Asn | 525  |
| 1576 | ATA | CCT | AGA | AGA | AAT | AAT | TGT | GGT | GTT | ACG | TCA | AAT | GGT | AGA | ATT | 1620 |
| 526  | Ile | Pro | Arg | Arg | Asn | Asn | Cys | Gly | Val | Thr | Ser | Asn | Gly | Arg | Ile | 540  |
| 1621 | TAT | TGT | ATT | GGG | GGA | TAT | GAT | GGC | TCT | TCT | ATT | ATA | CCG | AAT | GTA | 1665 |
| 541  | Tyr | Cys | Ile | Gly | Gly | Tyr | Asp | Gly | Ser | Ser | Ile | Ile | Pro | Asn | Val | 555  |
| 1666 | GAA | GCA | TAT | GAT | CAT | CGT | ATG | AAA | GCA | TGG | GTA | GAG | GTG | GCA | CCT | 1710 |
| 556  | Glu | Ala | Tyr | Asp | His | Arg | Met | Lys | Ala | Trp | Val | Glu | Val | Ala | Pro | 570  |
| 1711 | TTG | AAT | ACC | CCT | AGA | TCA | TCA | GCT | ATG | TGT | GTT | GCT | TTT | GAT | AAT | 1755 |
| 571  | Leu | Asn | Thr | Pro | Arg | Ser | Ser | Ala | Met | Cys | Val | Ala | Phe | Asp | Asn | 585  |
| 1756 | AAA | ATT | TAT | GTC | ATT | GGT | GGA | ACT | AAT | GGT | GAG | AGG | TTA | AAT | TCT | 1800 |
| 586  | Lys | Ile | Tyr | Val | Ile | Gly | Gly | Thr | Asn | Gly | Glu | Arg | Leu | Asn | Ser | 600  |
| 1801 | ATT | GAA | GTA | TAT | GAA | GAA | AAA | ATG | AAT | AAA | TGG | GAA | CAA | TTT | CCA | 1845 |
| 601  | Ile | Glu | Val | Tyr | Glu | Glu | Lys | Met | Asn | Lys | Trp | Glu | Gln | Phe | Pro | 615  |
| 1846 | TAT | GCC | TTA | TTA | GAA | GCT | AGA | AGT | TCA | GGA | GCA | GCT | TTT | AAT | TAC | 1890 |
| 616  | Tyr | Ala | Leu | Leu | Glu | Ala | Arg | Ser | Ser | Gly | Ala | Ala | Phe | Asn | Tyr | 630  |
| 1891 | CTT | AAT | CAA | ATA | TAT | GTT | GTT | GGA | GGT | ATT |     |     |     |     |     | 1920 |

631 Leu Asn Gln Ile Tyr Val Val Gly Gly Ile 640

>46\_K13\_Sample 4

|     |     |     |     |     |     |     |     |     |     |     |     |     |     |     |     |     |
|-----|-----|-----|-----|-----|-----|-----|-----|-----|-----|-----|-----|-----|-----|-----|-----|-----|
| 1   | ATG | GAA | GGA | GAA | AAA | GTA | AAA | ACA | AAA | GCA | AAT | AGT | ATC | TCG | AAT | 45  |
| 1   | Met | Glu | Gly | Glu | Lys | Val | Lys | Thr | Lys | Ala | Asn | Ser | Ile | Ser | Asn | 15  |
| 46  | TTT | TCT | ATG | ACG | TAT | GAT | AGG | GAA | TCT | GGT | GGT | AAC | AGC | AAT | AGT | 90  |
| 16  | Phe | Ser | Met | Thr | Tyr | Asp | Arg | Glu | Ser | Gly | Gly | Asn | Ser | Asn | Ser | 30  |
| 91  | GAT | GAT | AAA | AGC | GGA | AGT | AGT | AGC | GAG | AAT | GAT | TCT | AAT | TCA | TTT | 135 |
| 31  | Asp | Asp | Lys | Ser | Gly | Ser | Ser | Ser | Glu | Asn | Asp | Ser | Asn | Ser | Phe | 45  |
| 136 | ATG | AAT | CTA | ACT | AGT | GAT | AAA | AAT | GAG | AAA | ACG | GAA | AAT | AAT | AGT | 180 |
| 46  | Met | Asn | Leu | Thr | Ser | Asp | Lys | Asn | Glu | Lys | Thr | Glu | Asn | Asn | Ser | 60  |
| 181 | TTC | CTT | TTA | AAT | AAT | AGT | AGT | TAT | GGA | AAT | GTT | AAA | GAT | AGC | CTA | 225 |
| 61  | Phe | Leu | Leu | Asn | Asn | Ser | Ser | Tyr | Gly | Asn | Val | Lys | Asp | Ser | Leu | 75  |
| 226 | TTA | GAA | TCC | ATT | GAT | ATG | AGT | GTA | TTA | GAT | TCG | AAC | TTT | GAT | AGT | 270 |
| 76  | Leu | Glu | Ser | Ile | Asp | Met | Ser | Val | Leu | Asp | Ser | Asn | Phe | Asp | Ser | 90  |
| 271 | AAA | AAA | GAT | TTT | TTA | CCA | AGT | AAT | TTA | TCA | AGA | ACA | TTT | AAT | AAT | 315 |
| 91  | Lys | Lys | Asp | Phe | Leu | Pro | Ser | Asn | Leu | Ser | Arg | Thr | Phe | Asn | Asn | 105 |
| 316 | ATG | TCT | AAA | GAT | AAT | ATA | GGA | AAT | AAA | TAT | TTA | AAT | AAA | TTG | TTA | 360 |
| 106 | Met | Ser | Lys | Asp | Asn | Ile | Gly | Asn | Lys | Tyr | Leu | Asn | Lys | Leu | Leu | 120 |
| 361 | AAT | AAA | AAA | AAA | GAT | ACT | ATT | ACA | AAT | GAA | AAT | AAT | AAT | ATT | AAT | 405 |
| 121 | Asn | Lys | Lys | Lys | Asp | Thr | Ile | Thr | Asn | Glu | Asn | Asn | Asn | Ile | Asn | 135 |
| 406 | CAT | AAT | AAT | AAT | AAT | AAT | AAT | CTG | ACA | GCA | AAT | AAT | ATA | ACT | AAT | 450 |
| 136 | His | Asn | Asn | Asn | Asn | Asn | Asn | Leu | Thr | Ala | Asn | Asn | Ile | Thr | Asn | 150 |
| 451 | AAT | CTT | ATT | AAT | AAT | AAT | ATG | AAT | TCT | CCA | TCA | ATT | ATG | AAT | ACC | 495 |
| 151 | Asn | Leu | Ile | Asn | Asn | Asn | Met | Asn | Ser | Pro | Ser | Ile | Met | Asn | Thr | 165 |
| 496 | AAC | AAA | AAA | GAG | AAT | TTT | TTA | GAT | GCA | GCA | AAT | CTT | ATA | AAT | GAT | 540 |
| 166 | Asn | Lys | Lys | Glu | Asn | Phe | Leu | Asp | Ala | Ala | Asn | Leu | Ile | Asn | Asp | 180 |
| 541 | GAT | TCT | GGA | TTA | AAC | AAT | TTA | AAA | AAA | TTT | TCA | ACT | GTA | AAT | AAT | 585 |
| 181 | Asp | Ser | Gly | Leu | Asn | Asn | Leu | Lys | Lys | Phe | Ser | Thr | Val | Asn | Asn | 195 |
| 586 | GTA | AAT | GAT | ACT | TAT | GAA | AAG | AAA | ATT | ATT | GAA | ACG | GAA | TTA | AGT | 630 |
| 196 | Val | Asn | Asp | Thr | Tyr | Glu | Lys | Lys | Ile | Ile | Glu | Thr | Glu | Leu | Ser | 210 |
| 631 | GAT | GCT | AGT | GAT | TTT | GAA | AAT | ATG | GTA | GGT | GAT | TTA | AGA | ATT | ACA | 675 |
| 211 | Asp | Ala | Ser | Asp | Phe | Glu | Asn | Met | Val | Gly | Asp | Leu | Arg | Ile | Thr | 225 |
| 676 | TTT | ATT | AAT | TGG | TTA | AAA | AAG | ACA | CAA | ATG | AAT | TTT | ATT | CGA | GAA | 720 |
| 226 | Phe | Ile | Asn | Trp | Leu | Lys | Lys | Thr | Gln | Met | Asn | Phe | Ile | Arg | Glu | 240 |
| 721 | AAA | GAT | AAA | TTA | TTT | AAA | GAT | AAG | AAA | GAA | CTA | GAA | ATG | GAA | AGA | 765 |

|      |                                                             |      |
|------|-------------------------------------------------------------|------|
| 241  | Lys Asp Lys Leu Phe Lys Asp Lys Lys Glu Leu Glu Met Glu Arg | 255  |
| 766  | GTA CGA TTG TAC AAA GAA TTA GAA AAC CGT AAA AAT ATT GAA GAA | 810  |
| 256  | Val Arg Leu Tyr Lys Glu Leu Glu Asn Arg Lys Asn Ile Glu Glu | 270  |
| 811  | CAG AAA TTA CAT GAT GAA AGA AAG AAA TTA GAT ATT GAT ATA TCT | 855  |
| 271  | Gln Lys Leu His Asp Glu Arg Lys Lys Leu Asp Ile Asp Ile Ser | 285  |
| 856  | AAT GGT TAT AAA CAA ATA AAA AAA GAA AAA GAA GAA CAT AGG AAA | 900  |
| 286  | Asn Gly Tyr Lys Gln Ile Lys Lys Glu Lys Glu Glu His Arg Lys | 300  |
| 901  | CGA TTT GAT GAA GAA AGA TTA AGA TTT TTA CAA GAA ATC GAT AAA | 945  |
| 301  | Arg Phe Asp Glu Glu Arg Leu Arg Phe Leu Gln Glu Ile Asp Lys | 315  |
| 946  | ATT AAA TTA GTA TTA TAT TTA GAA AAA GAA AAA TAT TAT CAA GAA | 990  |
| 316  | Ile Lys Leu Val Leu Tyr Leu Glu Lys Glu Lys Tyr Tyr Gln Glu | 330  |
| 991  | TAT AAA AAT TTT GAG AAT GAT AAA AAA AAA ATT GTT GAT GCA AAT | 1035 |
| 331  | Tyr Lys Asn Phe Glu Asn Asp Lys Lys Lys Ile Val Asp Ala Asn | 345  |
| 1036 | ATT GCT ACT GAA ACT ATG ATT GAT ATT AAT GTT GGT GGA GCT ATT | 1080 |
| 346  | Ile Ala Thr Glu Thr Met Ile Asp Ile Asn Val Gly Gly Ala Ile | 360  |
| 1081 | TTT GAA ACA TCT AGA CAT ACC TTA ACA CAA CAA AAA GAT TCA TTT | 1125 |
| 361  | Phe Glu Thr Ser Arg His Thr Leu Thr Gln Gln Lys Asp Ser Phe | 375  |
| 1126 | ATA GAG AAA TTA TTA AGT GGA AGA CAT CAT GTA ACC AGA GAT AAA | 1170 |
| 376  | Ile Glu Lys Leu Leu Ser Gly Arg His His Val Thr Arg Asp Lys | 390  |
| 1171 | CAA GGA AGA ATA TTC TTA GAT AGG GAT AGT GAG TTA TTT AGA ATT | 1215 |
| 391  | Gln Gly Arg Ile Phe Leu Asp Arg Asp Ser Glu Leu Phe Arg Ile | 405  |
| 1216 | ATA CTT AAC TTC TTA AGA AAT CCG TTA ACT ATA CCC ATA CCA AAA | 1260 |
| 406  | Ile Leu Asn Phe Leu Arg Asn Pro Leu Thr Ile Pro Ile Pro Lys | 420  |
| 1261 | GAT TTA AGT GAA AGT GAA GCC TTG TTG AAA GAA GCA GAA TTT TAT | 1305 |
| 421  | Asp Leu Ser Glu Ser Glu Ala Leu Leu Lys Glu Ala Glu Phe Tyr | 435  |
| 1306 | GGT ATT AAA TTT TTA CCA TTC CCA TTA GTA TTT TGT ATA GGT GGA | 1350 |
| 436  | Gly Ile Lys Phe Leu Pro Phe Pro Leu Val Phe Cys Ile Gly Gly | 450  |
| 1351 | TTT GAT GGT GTA GAA TAT TTA AAT TCG ATG GAA TTA TTA GAT ATT | 1395 |
| 451  | Phe Asp Gly Val Glu Tyr Leu Asn Ser Met Glu Leu Leu Asp Ile | 465  |
| 1396 | AGT CAA CAA TGC TGG CGT ATG TGT ACA CCT ATG TCT ACC AAA AAA | 1440 |
| 466  | Ser Gln Gln Cys Trp Arg Met Cys Thr Pro Met Ser Thr Lys Lys | 480  |
| 1441 | GCT TAT TTT GGA AGT GCT GTA TTG AAT AAT TTC TTA TAC GTT TTT | 1485 |
| 481  | Ala Tyr Phe Gly Ser Ala Val Leu Asn Asn Phe Leu Tyr Val Phe | 495  |
| 1486 | GGT GGT AAT AAC TAT GAT TAT AAG GCT TTA TTT GAA ACT GAG GTG | 1530 |
| 496  | Gly Gly Asn Asn Tyr Asp Tyr Lys Ala Leu Phe Glu Thr Glu Val | 510  |

|      |     |     |     |     |     |     |     |     |     |     |     |     |     |     |     |      |
|------|-----|-----|-----|-----|-----|-----|-----|-----|-----|-----|-----|-----|-----|-----|-----|------|
| 1531 | TAT | GAT | CGT | TTA | AGA | GAT | GTA | TGG | TAT | GTT | TCA | AGG | AAT | TTA | AAT | 1575 |
| 511  | Tyr | Asp | Arg | Leu | Arg | Asp | Val | Trp | Tyr | Val | Ser | Arg | Asn | Leu | Asn | 525  |
| 1576 | ATA | CCT | AGA | AGA | AAT | AAT | TGT | GGT | GTT | ACG | TCA | AAT | GGT | AGA | ATT | 1620 |
| 526  | Ile | Pro | Arg | Arg | Asn | Asn | Cys | Gly | Val | Thr | Ser | Asn | Gly | Arg | Ile | 540  |
| 1621 | TAT | TGT | ATT | GGG | GGA | TAT | GAT | GGC | TCT | TCT | ATT | ATA | CCG | AAT | GTA | 1665 |
| 541  | Tyr | Cys | Ile | Gly | Gly | Tyr | Asp | Gly | Ser | Ser | Ile | Ile | Pro | Asn | Val | 555  |
| 1666 | GAA | GCA | TAT | GAT | CAT | CGT | ATG | AAA | GCA | TGG | GTA | GAG | GTG | GCA | CCT | 1710 |
| 556  | Glu | Ala | Tyr | Asp | His | Arg | Met | Lys | Ala | Trp | Val | Glu | Val | Ala | Pro | 570  |
| 1711 | TTG | AAT | ACC | CCT | AGA | TCA | TCA | GCT | ATG | TGT | GTT | GCT | TTT | GAT | AAT | 1755 |
| 571  | Leu | Asn | Thr | Pro | Arg | Ser | Ser | Ala | Met | Cys | Val | Ala | Phe | Asp | Asn | 585  |
| 1756 | AAA | ATT | TAT | GTC | ATT | GGT | GGA | ACT | AAT | GGT | GAG | AGA | TTA | AAT | TCT | 1800 |
| 586  | Lys | Ile | Tyr | Val | Ile | Gly | Gly | Thr | Asn | Gly | Glu | Arg | Leu | Asn | Ser | 600  |
| 1801 | ATT | GAA | GTA | TAT | GAA | GAA | AAA | ATG | AAT | AAA | TGG | GAA | CAA | TTT | CCA | 1845 |
| 601  | Ile | Glu | Val | Tyr | Glu | Glu | Lys | Met | Asn | Lys | Trp | Glu | Gln | Phe | Pro | 615  |
| 1846 | TAT | GCC | TTA | TTA | GAA | GCT | AGA | AGT | TCA | GGA | GCA | GCT | TTT | AAT | TAC | 1890 |
| 616  | Tyr | Ala | Leu | Leu | Glu | Ala | Arg | Ser | Ser | Gly | Ala | Ala | Phe | Asn | Tyr | 630  |
| 1891 | CTT | AAT | CAA | ATA | TAT | GTT | GTT | AGA | GGT | ATT |     |     |     |     |     | 1920 |
| 631  | Leu | Asn | Gln | Ile | Tyr | Val | Val | Arg | Gly | Ile |     |     |     |     |     | 640  |

■ Reference Codon     
 ■ Mutant Codon
